# Supplementary material for: Effects of solvent molecules on hemi-bonded (CH3SH)2+: infrared absorption of [(CH3SH)2–X]+ with X = H2O, (CH3)2CO, or NH3 and (CH3SH)n+ (n = 3–6)
Source: Royal Society of Chemistry journal article supplement (doi:10.1039/c9cp03158h), 2019-01-01
Supplement: c9cp03158h1.pdf [file c9cp03158h1.pdf]

**Effects of solvent molecules on hemi-bonded  $(\text{CH}_3\text{SH})_2^+$ : infrared  
absorption of  $[(\text{CH}_3\text{SH})_2\text{-X}]^+$  with  $\text{X} = \text{H}_2\text{O}$ ,  $(\text{CH}_3)_2\text{CO}$ , or  $\text{NH}_3$  and  
 $(\text{CH}_3\text{SH})_n^+$  ( $n = 3-6$ )**

Min Xie,<sup>\*ab</sup> Huei-Ru, Tsai,<sup>a</sup> Asuka Fujii,<sup>c</sup> and Yuan-Pern Lee<sup>\*ade</sup>

<sup>a</sup>*Department of Applied Chemistry and Institute of Molecular Science, National Chiao Tung University, 1001, Ta-Hsueh Road, Hsinchu 30010, Taiwan*

<sup>b</sup>*MOE Key Laboratory of Laser Life Science & Institute of Laser Life Science, College of Biophotonics, Guangzhou Key Laboratory of Spectral Analysis and Functional Probes, South China Normal University, Guangzhou 510631, China*

<sup>d</sup>*Department of Chemistry, Graduate School of Science, Tohoku University, Sendai 980-8578, Japan*

<sup>d</sup>*Center for Emergent Functional Matter Science, National Chiao Tung University, Hsinchu 30010, Taiwan*

<sup>e</sup>*Institute of Atomic and Molecular Sciences, Academia Sinica, Taipei 10617, Taiwan*

\*E-mail: [xiemin@m.scnu.edu.cn](mailto:xiemin@m.scnu.edu.cn) (MX); [yplee@mail.nctu.edu.tw](mailto:yplee@mail.nctu.edu.tw) (YPL)

## Table of Contents

- Table S1** Comparison of predicted scaled harmonic vibrational wavenumbers and IR intensities of  $[(\text{CH}_3\text{SH})_2\text{-H}_2\text{O}]^+$  with experiments.
- Table S2** Comparison of predicted scaled harmonic vibrational wavenumbers and IR intensities of  $[(\text{CH}_3\text{SH})_2\text{-(CH}_3)_2\text{CO}]^+$  with experiments.
- Table S3** Comparison of predicted scaled harmonic vibrational wavenumbers and IR intensities of  $[(\text{CH}_3\text{SH})_2\text{-NH}_3]^+$  with experiments.
- Table S4** Comparison of predicted scaled harmonic vibrational wavenumbers and IR intensities of  $(\text{CH}_3\text{SH})_3^+$  with experiments.
- Table S5** Second-order perturbation energy  $E(2)$  ( $\text{kJ mol}^{-1}$ ) for the intermolecular interactions in  $[(\text{CH}_3\text{SH})_2\text{-X}]^+$  with  $\text{X} = \text{H}_2\text{O}$  or  $\text{CH}_3\text{SH}$  or  $(\text{CH}_3)_2\text{CO}$  or  $\text{NH}_3$ , predicted at the UB3LYP/aug-cc-pVDZ method with the structures optimized at UMP2/aug-cc-pVDZ method.
- Fig. S1** Representative geometric parameters of six structures of  $[(\text{CH}_3\text{SH})_2\text{-H}_2\text{O}]^+$  predicted with the UMP2/aug-cc-pVDZ method.
- Fig. S2** Representative geometric parameters of six structures of  $[(\text{CH}_3\text{SH})_2\text{-(CH}_3)_2\text{CO}]^+$  predicted with the UMP2/aug-cc-pVDZ method.
- Fig. S3** Representative geometric parameters of five structures of  $[(\text{CH}_3\text{SH})_2\text{-NH}_3]^+$  predicted with the UMP2/aug-cc-pVDZ method.
- Fig. S4** Representative geometric parameters of three structures of  $(\text{CH}_3\text{SH})_3^+$  predicted with the UMP2/aug-cc-pVDZ method.
- Fig. S5** Comparison of observed spectrum of  $(\text{CH}_3\text{SH})_4^+$  with the stick spectra of possible structures predicted with the UMP2/aug-cc-pVDZ method in region  $2000\text{--}3150\text{ cm}^{-1}$ .
- Fig. S6** Comparison of observed spectrum of  $(\text{CH}_3\text{SH})_5^+$  with the stick spectra of possible structures predicted with the UMP2/aug-cc-pVDZ method in region  $2000\text{--}3200\text{ cm}^{-1}$ .
- Fig. S7** Comparison of observed spectrum of  $(\text{CH}_3\text{SH})_6^+$  with the stick spectra of possible structures predicted with the UMP2/aug-cc-pVDZ method in region  $2000\text{--}3200\text{ cm}^{-1}$ .

**Table S1** Comparison of predicted scaled harmonic vibrational wavenumbers and IR intensities of  $[(\text{CH}_3\text{SH})_2\text{-H}_2\text{O}]^+$  with experiments.

| Experiment    | Calculation                          |                                      |                                      |                                      |                                      |                                      | Assignment           |
|---------------|--------------------------------------|--------------------------------------|--------------------------------------|--------------------------------------|--------------------------------------|--------------------------------------|----------------------|
|               | 2M <sub>b</sub> -W                   | 2M <sub>a</sub> -W                   | M-W-M                                | M-M-W                                | M-MW                                 | MW-M                                 |                      |
| 3712          | 3669 <sup>a</sup> (116) <sup>b</sup> | 3673 <sup>a</sup> (115) <sup>b</sup> | 3540 <sup>a</sup> (194) <sup>b</sup> | 3682 <sup>a</sup> (134) <sup>b</sup> | 3674 <sup>a</sup> (118) <sup>b</sup> | 3576 <sup>a</sup> (206) <sup>b</sup> | <i>a</i> -OH-stretch |
| 3629          | 3561 (54)                            | 3562 (50)                            |                                      | 3568 (56)                            | 3559 (51)                            | 3097 (1506)                          | <i>s</i> -OH-stretch |
|               | 3054 (0.5)                           | 3055 (8.1)                           | 3061 (0.2)                           | 3069 (2.2)                           | 3060 (6.4)                           | 3059 (5.9)                           | <i>a</i> -CH-stretch |
| 3020          | 3053 (1.6)                           | 3052 (0.8)                           | 3052 (0.4)                           | 3061 (3.4)                           | 3053 (0.5)                           | 3057 (2.5)                           |                      |
|               | 3046 (3.3)                           | 3047 (2.5)                           | 3050 (1.1)                           | 3032 (4.0)                           | 3045 (0.6)                           | 3048 (0.5)                           |                      |
|               | 3045 (0.9)                           | 3042 (4.4)                           | 3005 (3.3)                           | 2998 (4.5)                           | 3016 (4.0)                           | 3034 (12)                            |                      |
| 2946          | 2935 (12)                            | 2934 (6.9)                           | 2945 (2.1)                           | 2946 (0.4)                           | 2938 (3.6)                           | 2941 (5.1)                           | <i>s</i> -CH-stretch |
|               | 2935 (0.1)                           | 2933 (2.1)                           | 2906 (1.5)                           | 2905 (2.5)                           | 2913 (4.4)                           | 2924 (5.2)                           |                      |
| 2567          | 2509 (0.9)                           | 2584 (25)                            | 2601 (4.9)                           | 2599 (7.1)                           | 2615 (5.6)                           | 2615 (5.6)                           | free SH-stretch      |
| broad feature | 2528 (256)                           | 2418 (397)                           | 2229 (1458) <sup>c</sup>             | 2211 (1128)                          | 1675 (3085)                          | 2584 (30)                            | H-bonded             |
|               |                                      |                                      | 1966 (6554) <sup>c</sup>             | 1785 (3120)                          |                                      |                                      | SH-stretch           |
|               | 1593 (71)                            | 1589 (66)                            | 1556 (116)                           | 1573 (27)                            | 1575 (150)                           | 1561 (11)                            | HOH-bend             |

<sup>a</sup> Calculated with the UMP2/aug-cc-pVDZ method and scaled by a linear equation  $y = 0.930 x + 61.0$ , in which  $x$  is the harmonic vibrational wavenumber. <sup>b</sup> IR intensities in  $\text{km mol}^{-1}$ . <sup>c</sup> stretch vibration of  $\text{H}_3\text{O}^+$ . In the structure of **M-W-M** the proton of one  $\text{CH}_3\text{SH}$  transfers to  $\text{H}_2\text{O}$ .

**Table S2** Comparison of predicted scaled harmonic vibrational wavenumbers and IR intensities of  $[(\text{CH}_3\text{SH})_2-(\text{CH}_3)_2\text{CO}]^+$  with experiments.

| Experiment    | Calculation                          |                                      |                                      |                                      |                                      |                                      | Assignments                           |
|---------------|--------------------------------------|--------------------------------------|--------------------------------------|--------------------------------------|--------------------------------------|--------------------------------------|---------------------------------------|
|               | 2M <sub>b</sub> A                    | 2M <sub>a</sub> A                    | M-M-A1                               | M-M-A2                               | M-MA                                 | MA-M                                 |                                       |
| 3020          | 3050 <sup>a</sup> (1.0) <sup>b</sup> | 3058 <sup>a</sup> (8.9) <sup>b</sup> | 3052 <sup>a</sup> (0.4) <sup>b</sup> | 3061 <sup>a</sup> (0.8) <sup>b</sup> | 3059 <sup>a</sup> (2.8) <sup>b</sup> | 3052 <sup>a</sup> (0.4) <sup>b</sup> | <i>a</i> -CH-stretch                  |
|               | 3050 (1.1)                           | 3049 (0.4)                           | 3050 (3.1)                           | 3059 (1.8)                           | 3053 (0.4)                           | 3052 (1.1)                           |                                       |
|               | 3042 (1.4)                           | 3046 (1.2)                           | 3044 (1.1)                           | 3028 (1.7)                           | 3047 (0.7)                           | 3044 (2.5)                           |                                       |
|               | 3042 (0.4)                           | 3042 (3.1)                           | 2990 (4.4)                           | 2993 (2.1)                           | 3030 (6.0)                           | 3044 (5.2)                           |                                       |
|               | 3039 (1.1)                           | 3037 (3.5)                           | 3054 (2.2)                           | 3047 (1.9)                           | 3048 (1.2)                           | 3038 (1.7)                           | <i>a</i> -CH-stretch                  |
|               | 3038 (11)                            | 3031 (8.4)                           | 3052 (0.5)                           | 3034 (6.8)                           | 3044 (3.4)                           | 3001 (0.6)                           | of (CH <sub>3</sub> ) <sub>2</sub> CO |
|               | 2996 (0.1)                           | 2996 (0.5)                           | 2999 (1.5)                           | 2997 (0.5)                           | 2998 (0.6)                           | 2997 (0.3)                           |                                       |
|               | 2990 (0.0)                           | 2990 (0.1)                           | 2989 (1.3)                           | 2990 (0.1)                           | 2992 (0.5)                           | 3018 (31)                            |                                       |
| 2946          | 2932 (10)                            | 2934 (4.2)                           | 2940 (6.8)                           | 2943 (0.6)                           | 2941 (5.5)                           | 2941 (8.8)                           | <i>s</i> -CH-stretch                  |
|               | 2932 (0.4)                           | 2930 (2.0)                           | 2903 (4.7)                           | 2900 (0.1)                           | 2925 (0.9)                           | 2908 (26)                            |                                       |
|               | 2917 (0.7)                           | 2915 (0.9)                           | 2912 (11)                            | 2917 (2.5)                           | 2917 (1.7)                           | 2913 (2.2)                           | <i>s</i> -CH-stretch                  |
|               | 2912 (0.3)                           | 2911 (0.4)                           | 2902 (13)                            | 2912 (1.9)                           | 2912 (2.2)                           | 2910 (2.7)                           | of (CH <sub>3</sub> ) <sub>2</sub> CO |
| 2559          | 2443 (16)                            | 2582 (22)                            | 2615 (2.5)                           |                                      | 2605 (1.8)                           | 2616 (1.6)                           | free SH-stretch                       |
|               |                                      |                                      |                                      |                                      |                                      | 2593 (25)                            |                                       |
| broad feature | 2472 (662)                           | 2253 (1041)                          | 2364 (3432)                          | 1941 (2049)<br>1697 (586)            | 1981 (2072)                          |                                      | H-bonded SH-stretch                   |

<sup>a</sup> Calculated with the UMP2/aug-cc-pVDZ method and scaled by a linear equation  $y = 0.930 x + 61.0$ , in which  $x$  is the harmonic vibrational wavenumber. <sup>b</sup> IR intensities in  $\text{km mol}^{-1}$ .

**Table S3** Comparison of predicted scaled harmonic vibrational wavenumbers and IR intensities of  $[(\text{CH}_3\text{SH})_2\text{-NH}_3]^+$  with experiments.

| Experiment    | Calculation                          |                                     |                                     |                                     |                                     | Assignments                        |
|---------------|--------------------------------------|-------------------------------------|-------------------------------------|-------------------------------------|-------------------------------------|------------------------------------|
|               | M-M-N                                | 2M <sub>b</sub> N                   | 2M <sub>a</sub> N                   | M-MN                                | MN-M                                |                                    |
| 3379          | 3387 <sup>a</sup> (104) <sup>b</sup> | 3383 <sup>a</sup> (96) <sup>b</sup> | 3383 <sup>a</sup> (99) <sup>b</sup> | 3429 <sup>a</sup> (58) <sup>b</sup> | 3433 <sup>a</sup> (60) <sup>b</sup> | <i>a</i> -NH <sub>x</sub> -stretch |
|               |                                      | 3380 (107)                          | 3380 (108)                          | 3424 (65)                           | 3358 (195)                          |                                    |
| 3320          | 3314 (179)                           | 3258 (90)                           | 3258 (100)                          | 3267 (73)                           | 3143 (488)                          | <i>s</i> -NH <sub>x</sub> -stretch |
|               | 3050 (1.1)                           | 3056 (2.6)                          | 3049 (3.2)                          | 3051 (0.4)                          | 3056 (4.6)                          |                                    |
|               | 3044 (0.8)                           | 3046 (0.8)                          | 3045 (0.2)                          | 3050 (1.3)                          | 3055 (0.3)                          | <i>a</i> -CH-stretch               |
|               | 3041 (1.2)                           | 3026 (1.6)                          | 3026 (2.3)                          | 3042 (1.1)                          | 3046 (0.8)                          |                                    |
|               | 3004 (4.5)                           | 3008 (3.0)                          | 3010 (2.6)                          | 3032 (5.1)                          | 3044 (7.9)                          |                                    |
|               | 2937 (23)                            | 2939 (3.2)                          | 2935 (6.8)                          | 2937 (5.0)                          | 2941 (6.5)                          | <i>s</i> -CH-stretch               |
|               | 2907 (7.4)                           | 2914 (6.0)                          | 2916 (10)                           | 2928 (2.6)                          | 2933 (2.4)                          |                                    |
| broad feature | 2917 (1126)                          | 2171 (3408)                         | 2607 (3825)                         | 2127 (1525)                         |                                     | H-bonded NH-stretch                |
|               | 2781 (1509)                          |                                     |                                     |                                     |                                     |                                    |
|               | 2606 (7.8)                           | 2607 (7.3)                          | 2161 (9.7)                          | 2606 (4.9)                          | 2616 (3.4)                          | free SH-stretch                    |
|               |                                      |                                     |                                     |                                     | 2590 (14)                           |                                    |

<sup>a</sup> Calculated with the UMP2/aug-cc-pVDZ method and scaled by a linear equation  $y = 0.930 x + 61.0$ , in which  $x$  is the harmonic vibrational wavenumber. <sup>b</sup> IR intensities in  $\text{km mol}^{-1}$ .

**Table S4** Comparison of predicted scaled harmonic vibrational wavenumbers and IR intensities of  $(\text{CH}_3\text{SH})_3^+$  with experiments.

| Experiment    | Calculation                          |                                      |                                      | Assignments                                     |
|---------------|--------------------------------------|--------------------------------------|--------------------------------------|-------------------------------------------------|
|               | $3\text{M}_a$                        | $3\text{M}_b$                        | $3\text{M}_{\text{HB}}$              |                                                 |
| 3024          | 3051 <sup>a</sup> (3.2) <sup>b</sup> | 3053 <sup>a</sup> (0.3) <sup>b</sup> | 3060 <sup>a</sup> (1.7) <sup>b</sup> | <i>a</i> -CH-stretch                            |
|               | 3050 (0.1)                           | 3053 (1.3)                           | 3057 (2.5)                           |                                                 |
|               | 3047 (0.8)                           | 3049 (1.6)                           | 3052 (0.3)                           |                                                 |
|               | 3046 (2.8)                           | 3047 (2.7)                           | 3044 (0.8)                           |                                                 |
|               | 3040 (1.5)                           | 3045 (1.0)                           | 3030 (5.0)                           |                                                 |
|               | 3036 (4.2)                           | 3039 (3.1)                           | 2996 (3.7)                           |                                                 |
|               | 2937 (6.0)                           | 2940 (5.3)                           | 2941 (0.2)                           | <i>s</i> -CH-stretch                            |
| 2947          | 2932 (6.1)                           | 2935 (7.4)                           | 2938 (4.1)                           |                                                 |
|               | 2929 (3.4)                           | 2931 (3.7)                           | 2905 (2.3)                           |                                                 |
| 2595          | 2608 (4.8)                           | 2610 (3.5)                           | 2600 (4.5)                           | free SH-stretch of third $\text{CH}_3\text{SH}$ |
| 2565          | 2581 (24)                            | 2555 (45)                            |                                      | free SH-stretch                                 |
| broad feature | 2237 (953)                           | 2250 (957)                           | 1884 (1986)                          | H-bonded SH-stretch                             |
|               |                                      |                                      | 1660 (4322)                          |                                                 |

<sup>a</sup> Calculated with the UMP2/aug-cc-pVDZ method and scaled by a linear equation  $y = 0.930 x + 61.0$ , in which  $x$  is the harmonic vibrational wavenumber. <sup>b</sup> IR intensities in  $\text{km mol}^{-1}$ .

**Table S5** Second-order perturbation energy  $E(2)$  ( $\text{kJ mol}^{-1}$ ) for the intermolecular interactions in  $[(\text{CH}_3\text{SH})_2\text{-X}]^+$  with  $\text{X} = \text{H}_2\text{O}$  or  $\text{CH}_3\text{SH}$  or  $(\text{CH}_3)_2\text{CO}$  or  $\text{NH}_3$ , predicted at the UB3LYP/aug-cc-pVDZ method with the structures optimized at UMP2/aug-cc-pVDZ method.

|                                                         | Structure               | Lp (X) $\rightarrow$ $\sigma^*$ (SH) | Lp (S) $\rightarrow$ $\sigma^*$ (XH) |
|---------------------------------------------------------|-------------------------|--------------------------------------|--------------------------------------|
| $[(\text{CH}_3\text{SH})_2\text{-H}_2\text{O}]^+$       | <b>2M<sub>b</sub>-W</b> | 28.6 <sup>a</sup>                    | --                                   |
|                                                         | <b>2M<sub>a</sub>-W</b> | 30.5                                 | --                                   |
| $(\text{CH}_3\text{SH})_3^+$                            | <b>3M<sub>b</sub></b>   | 43.6                                 | --                                   |
|                                                         | <b>3M<sub>a</sub></b>   | 48.2                                 | --                                   |
| $[(\text{CH}_3\text{SH})_2\text{-(CH}_3)_2\text{CO}]^+$ | <b>2M<sub>b</sub>-A</b> | 42.2                                 | --                                   |
|                                                         | <b>2M<sub>a</sub>-A</b> | 42.0                                 | --                                   |
| $[(\text{CH}_3\text{SH})_2\text{-NH}_3]^+{}^b$          | <b>2M<sub>b</sub>-N</b> | --                                   | 125.3                                |
|                                                         | <b>2M<sub>a</sub>-N</b> | --                                   | 125.6                                |

<sup>a</sup> In **2M<sub>b</sub>-W** and **2M<sub>b</sub>-A**, the solvent molecule is hydrogen bonded to the two SH bonds in the ion core. <sup>b</sup> the proton was transferred only in the  $[(\text{CH}_3\text{SH})_2\text{-NH}_3]^+$  cluster, reflecting the interaction of Lp (S)  $\rightarrow$   $\sigma^*$  (XH). The  $E(2)$  were predicted at the UB3LYP/aug-cc-pVDZ method with the structures optimized with the UMP2/aug-cc-pVDZ method.

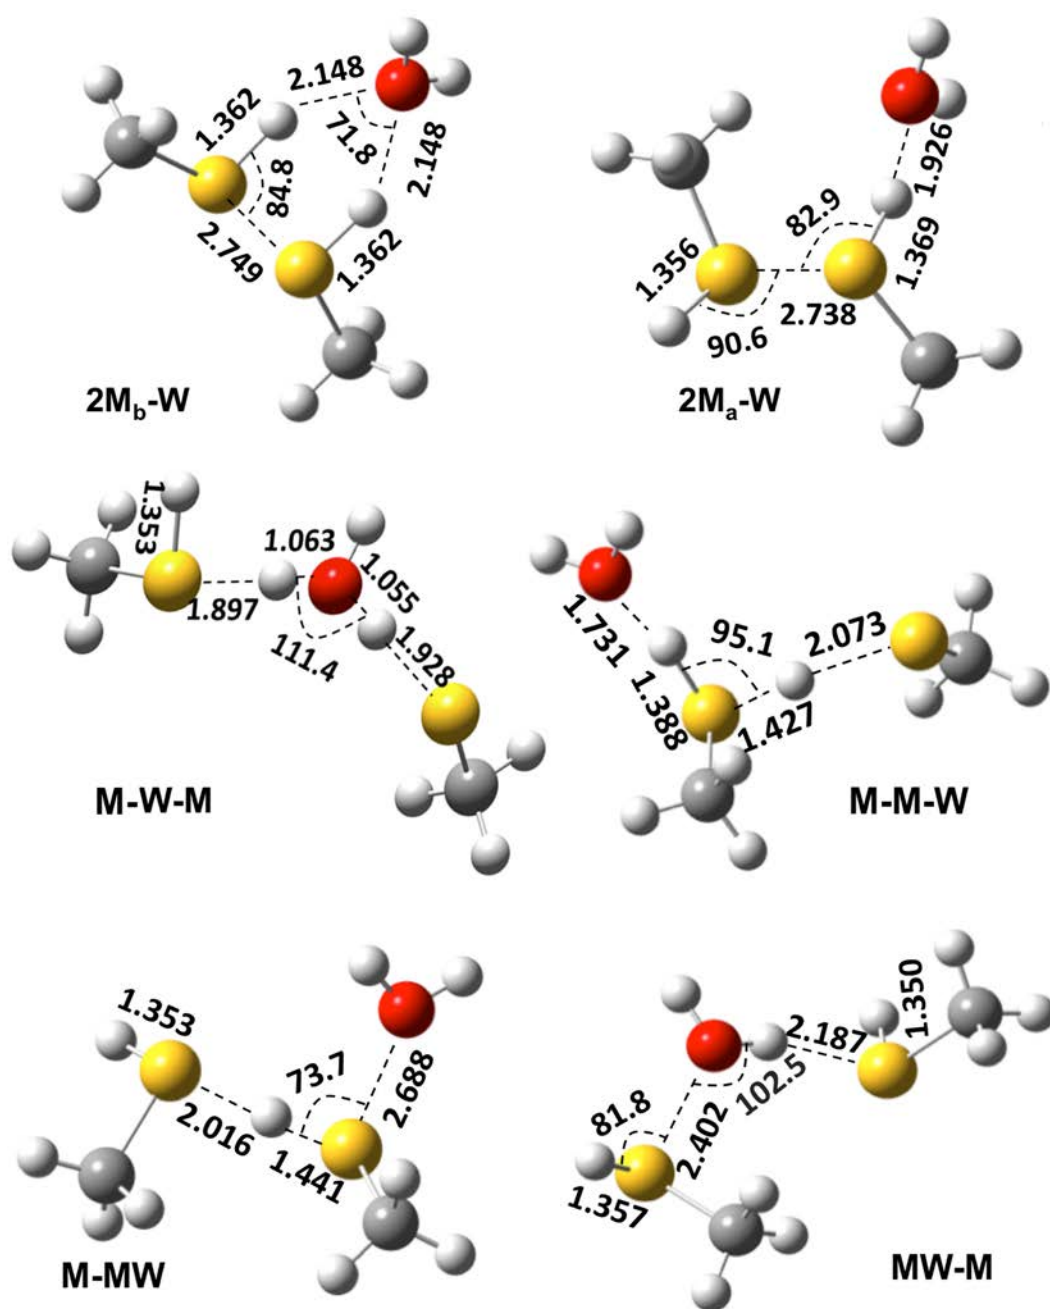

**Fig. S1** Representative geometric parameters of six structures of  $[(\text{CH}_3\text{SH})_2\text{-H}_2\text{O}]^+$  predicted with the UMP2/aug-cc-pVDZ method. Bond distances are in Å; bond angles are in degree.



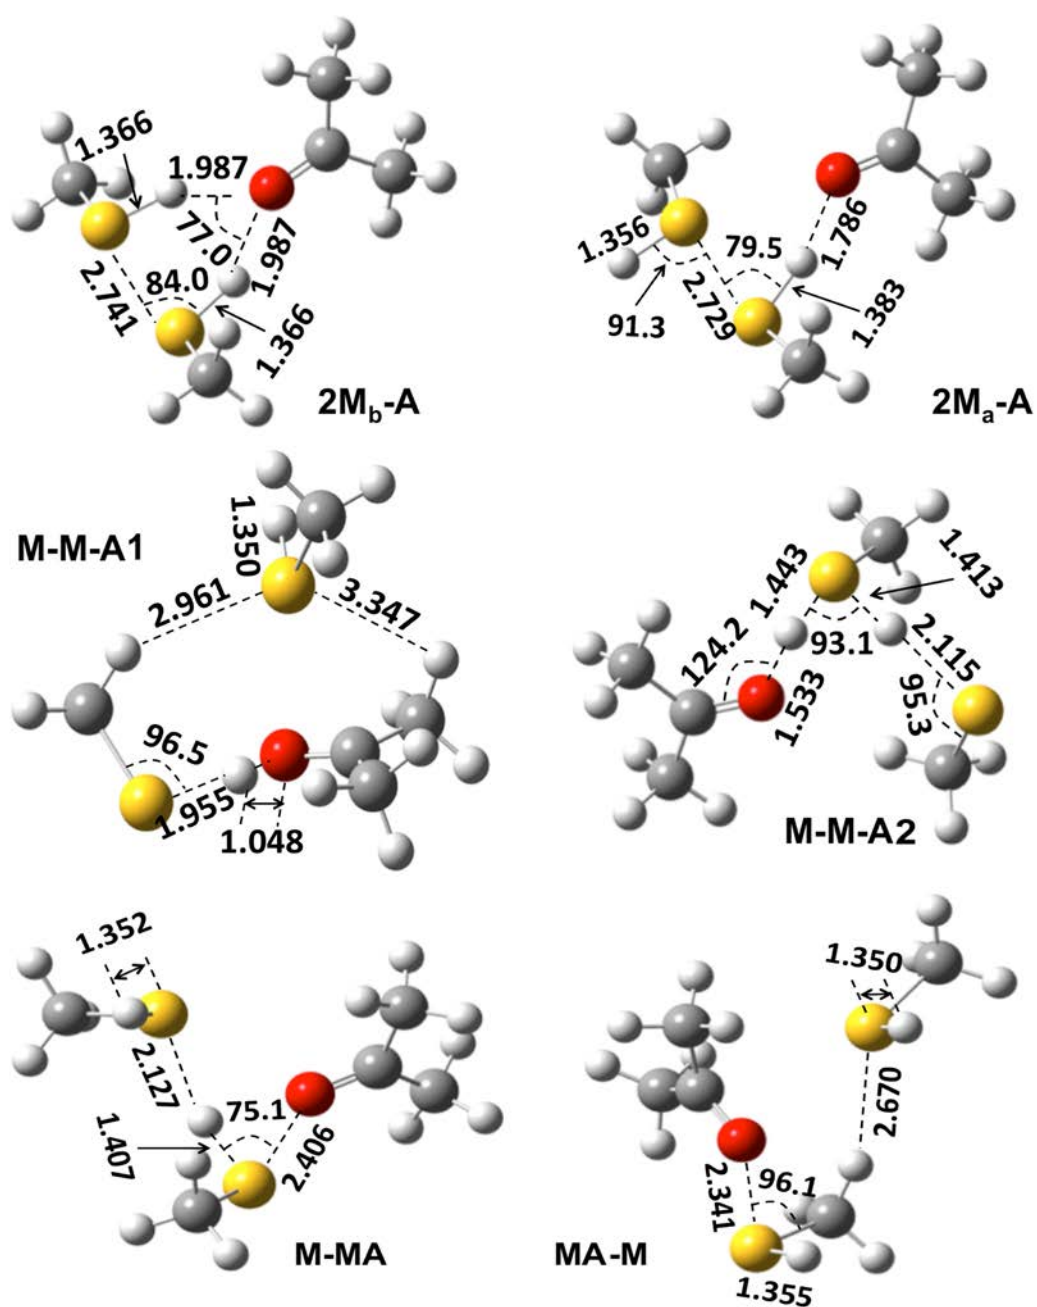

**Fig. S2** Representative geometric parameters of six structures of  $[(\text{CH}_3\text{SH})_2-(\text{CH}_3)_2\text{CO}]^+$  predicted with the UMP2/aug-cc-pVDZ method. Bond distances are in Å; bond angles are in degree.

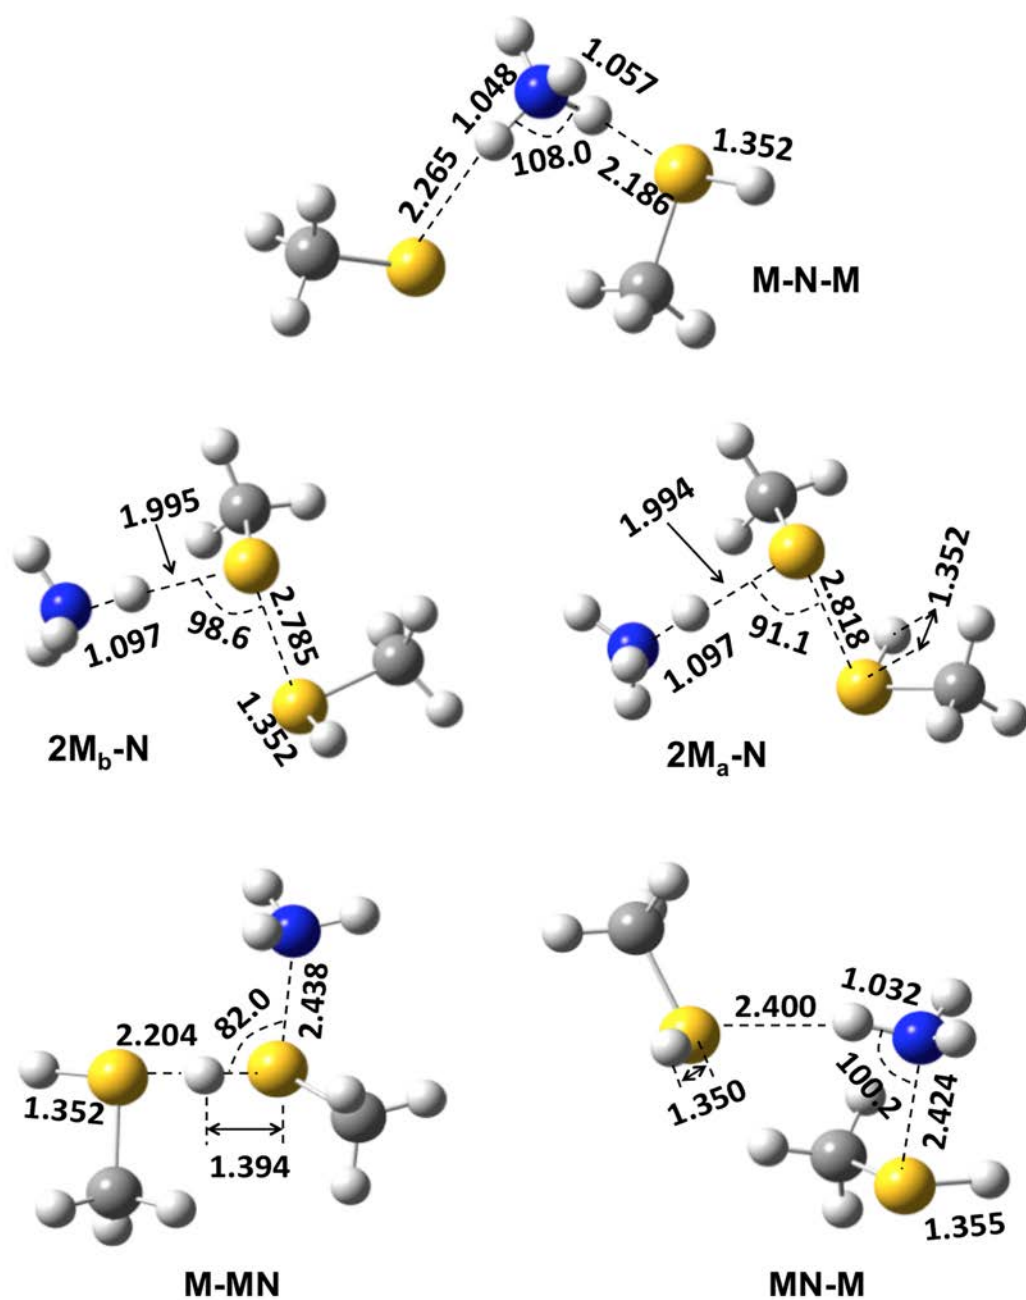

**Fig. S3** Representative geometric parameters of five structures of  $[(\text{CH}_3\text{SH})_2\text{-NH}_3]^+$  predicted with the UMP2/aug-cc-pVDZ method. Bond distances are in Å; bond angles are in degree.

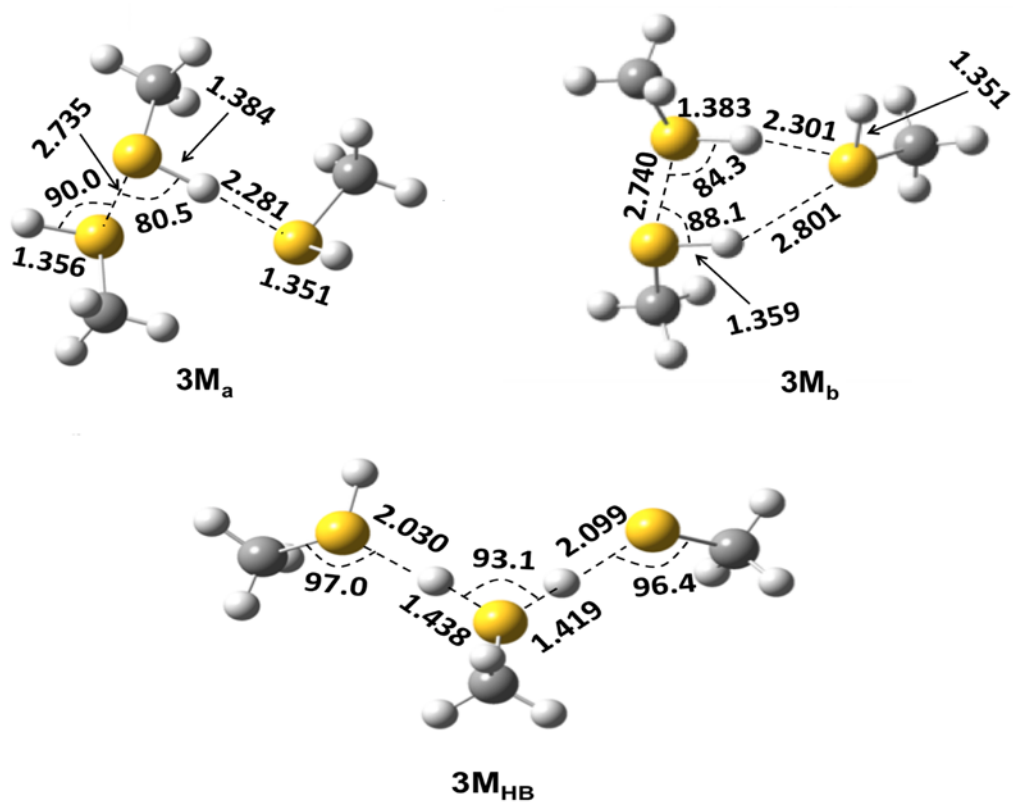

**Fig. S4** Representative geometric parameters of three structures of  $(\text{CH}_3\text{SH})_3^+$  predicted with the UMP2/aug-cc-pVDZ method. Bond distances are in Å; bond angles are in degree.

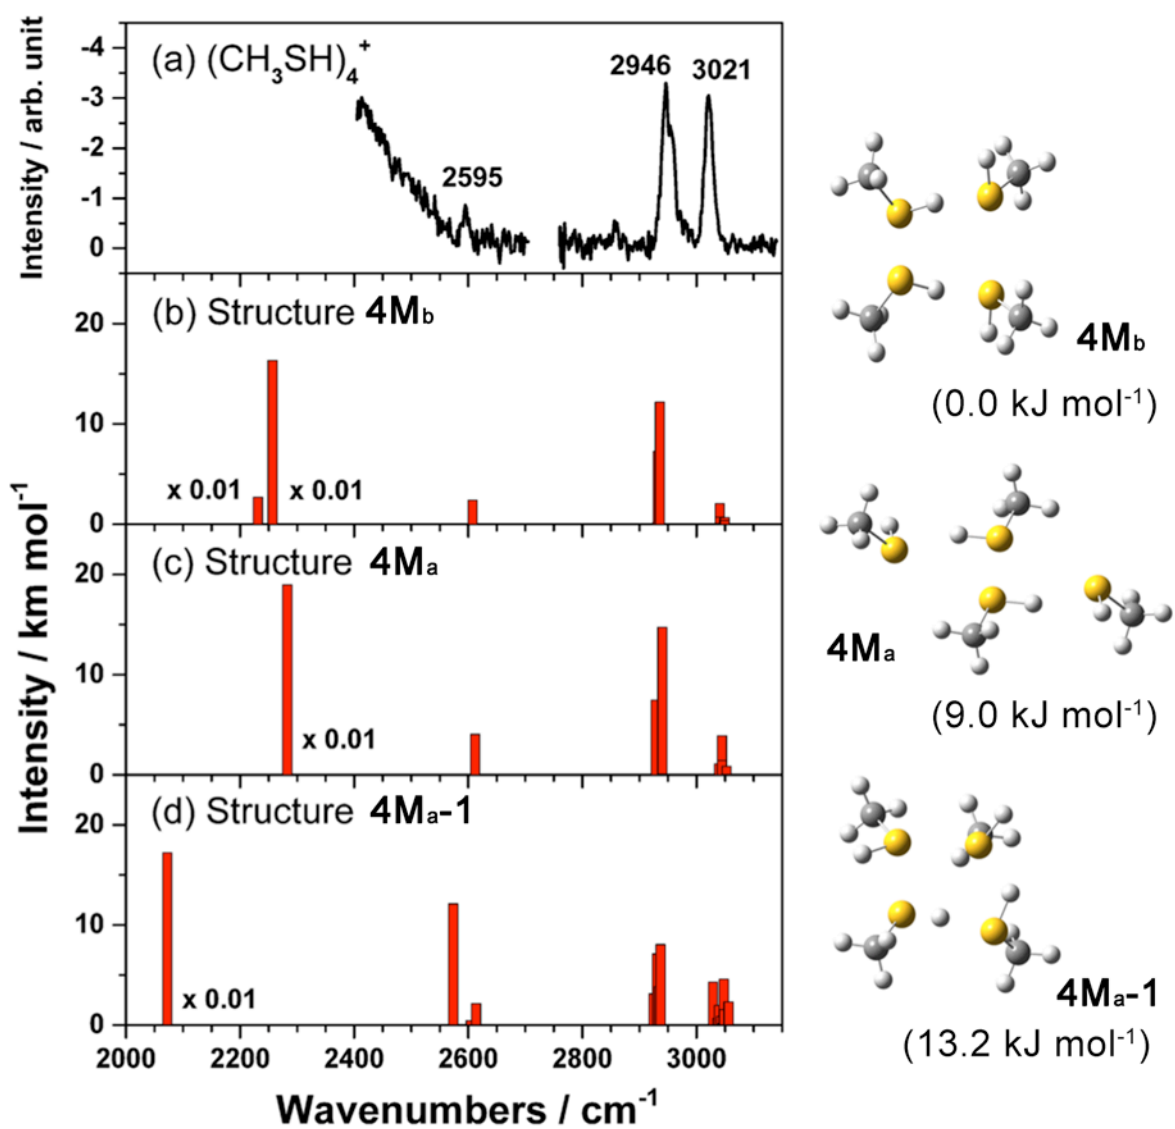

**Fig. S5** Comparison of observed spectrum of  $(\text{CH}_3\text{SH})_4^+$  with the stick spectra of possible structures predicted with the UMP2/aug-cc-pVDZ method in region 2000–3150  $\text{cm}^{-1}$ . (a) Experiment; (b)  $4\text{M}_b$ ; (c)  $4\text{M}_a$ ; (d)  $4\text{M}_{a-1}$ . The three stable structures are shown on the right with their related energy ( $\text{kJ mol}^{-1}$ ) listed in parenthesis.

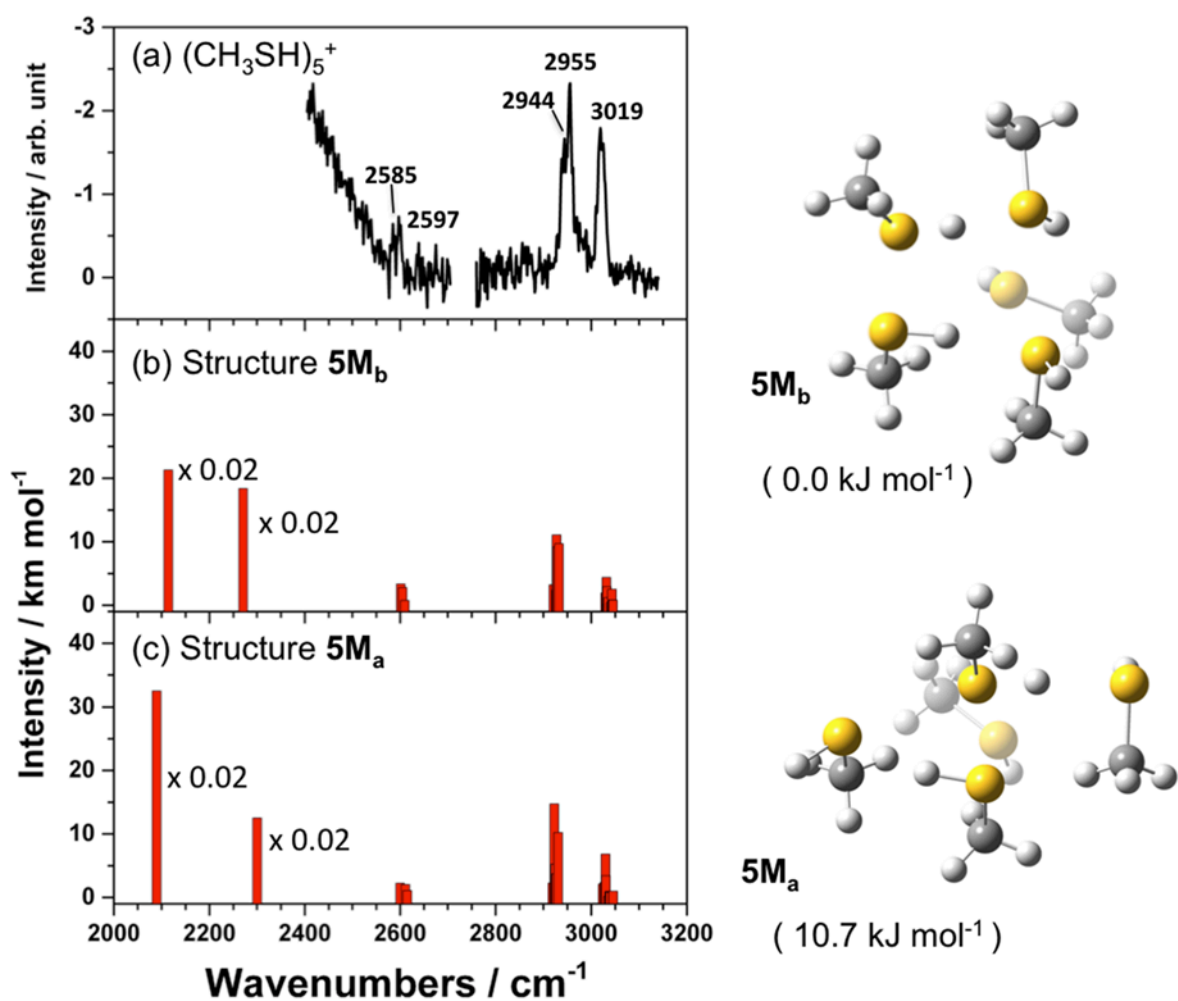

**Fig. S6** Comparison of observed spectrum of  $(\text{CH}_3\text{SH})_5^+$  with the stick spectra of possible structures predicted with the UMP2/aug-cc-pVDZ method in region  $2000\text{--}3200 \text{ cm}^{-1}$ . (a) Experiment; (b)  $5\text{M}_b$ ; (c)  $5\text{M}_a$ . The two structures are shown on the right with their related energy ( $\text{kJ mol}^{-1}$ ) listed in parenthesis.

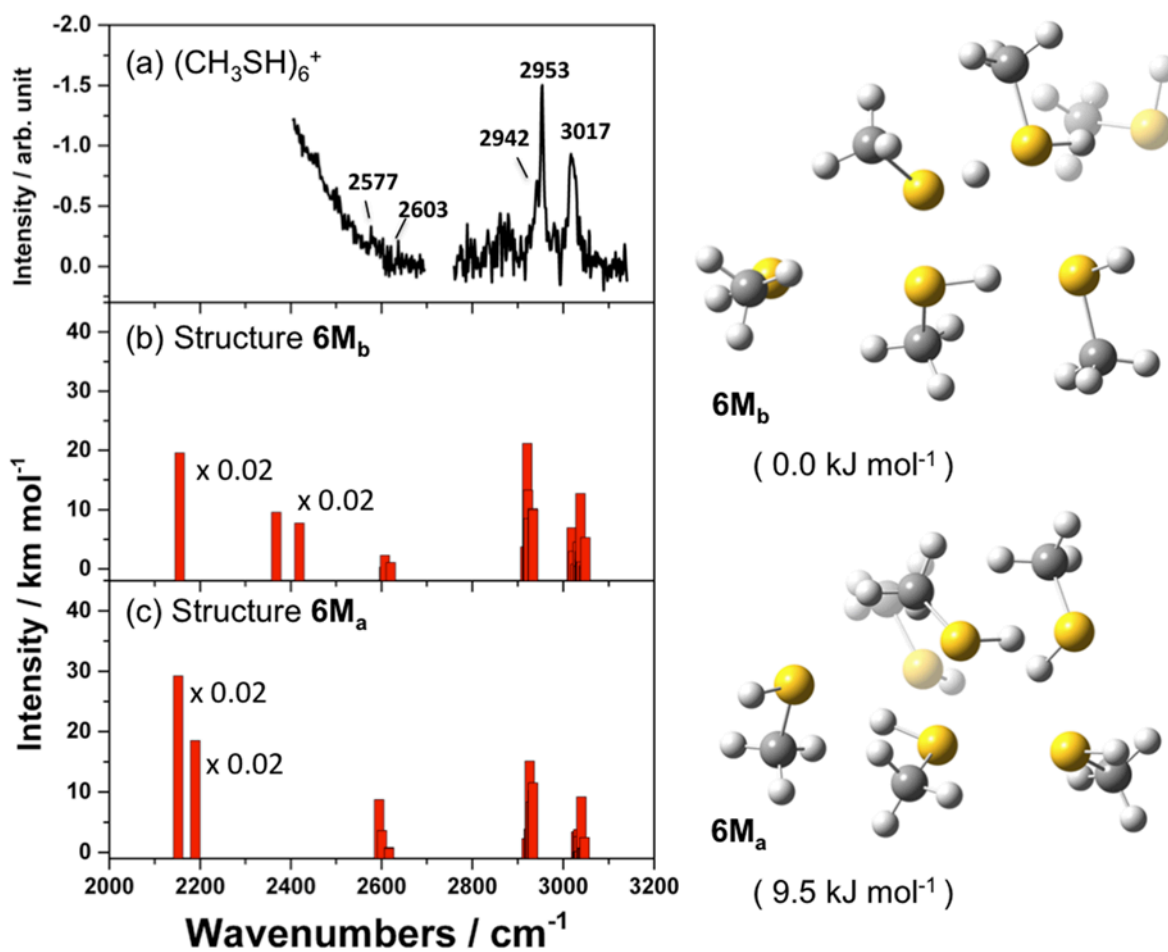

**Fig. S7** Comparison of observed spectrum of  $(\text{CH}_3\text{SH})_6^+$  with the stick spectra of possible structures predicted with the UMP2/aug-cc-pVDZ method in region 2000–3200  $\text{cm}^{-1}$ . (a) Experiment; (b)  $6\text{M}_b$ ; (c)  $6\text{M}_a$ . The two structures are shown on the right with their related energy ( $\text{kJ mol}^{-1}$ ) listed in parenthesis.
